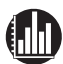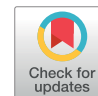

# Adiponectin, Free Fatty Acids, and Cardiovascular Outcomes in Patients With Type 2 Diabetes and Acute Coronary Syndrome

*Diabetes Care* 2018;41:1792–1800 | <https://doi.org/10.2337/dc18-0158>

Ilse C. Schrieks,<sup>1</sup> Anna Nozza,<sup>2</sup>  
Barbara E. Stähli,<sup>3</sup> John B. Buse,<sup>4</sup>  
Robert R. Henry,<sup>5</sup> Klas Malmberg,<sup>6</sup>  
Bruce Neal,<sup>7</sup> Stephen J. Nicholls,<sup>8</sup>  
Lars Rydén,<sup>9</sup> Linda Mellbin,<sup>9</sup>  
Anders Svensson,<sup>10</sup> Hans Wedel,<sup>11</sup>  
Arlette Weichert,<sup>10</sup> A. Michael Lincoff,<sup>12</sup>  
Jean-Claude Tardif,<sup>13</sup>  
Diederick E. Grobbee,<sup>1</sup> and  
Gregory G. Schwartz<sup>14</sup>

## OBJECTIVE

In observational cohorts, adiponectin is inversely associated and free fatty acids (FFAs) are directly associated with incident coronary heart disease (CHD). Adiponectin tends to be reduced and FFAs elevated in type 2 diabetes. We investigated relationships of adiponectin and FFA and major adverse cardiovascular events (MACEs) and death in patients with acute coronary syndrome (ACS) and type 2 diabetes using data from the AleCardio (Effect of Alogliptazar on Cardiovascular Outcomes After Acute Coronary Syndrome in Patients With Type 2 Diabetes Mellitus) trial, which compared the PPAR- $\alpha/\gamma$  agonist alogliptazar with placebo.

## RESEARCH DESIGN AND METHODS

Using Cox regression adjusted for demographic, laboratory, and treatment variables, we determined associations of baseline adiponectin and FFAs, or the change in adiponectin and FFAs from baseline, with MACEs (cardiovascular death, myocardial infarction, or stroke) and death.

## RESULTS

A twofold higher baseline adiponectin ( $n = 6,998$ ) was directly associated with risk of MACEs (hazard ratio [HR] 1.17 [95% CI 1.08–1.27]) and death (HR 1.53 [95% CI 1.35–1.73]). A doubling of adiponectin from baseline to month 3 ( $n = 6,325$ ) was also associated with risk of death (HR 1.20 [95% CI 1.03–1.41]). Baseline FFAs ( $n = 7,038$ ), but not change in FFAs from baseline ( $n = 6,365$ ), were directly associated with greater risk of MACEs and death. There were no interactions with study treatment.

## CONCLUSIONS

In contrast to prior observational data for incident CHD, adiponectin is prospectively associated with MACEs and death in patients with type 2 diabetes and ACS, and an increase in adiponectin from baseline is directly related to death. These findings raise the possibility that adiponectin has different effects in patients with type 2 diabetes and ACS than in populations without prevalent cardiovascular disease. Consistent with prior data, FFAs are directly associated with adverse outcomes.

Adiponectin and free fatty acids (FFAs) are markers of adipocyte function. Adiponectin is a hormone secreted by adipocytes and signals through specific receptors in target tissues, including myocardium and arterial wall. Adiponectin may modulate insulin action and sensitivity and has putative antiatherogenic and anti-inflammatory effects (1). Infusion of adiponectin in experimental animals may mitigate myocardial

<sup>1</sup>Julius Clinical and Julius Center for Health Sciences and Primary Care, University Medical Center Utrecht, Utrecht, the Netherlands

<sup>2</sup>Montreal Health Innovations Coordinating Center, Montreal Heart Institute, Montreal, Canada

<sup>3</sup>Department of Cardiology, Charité Berlin-University Medicine, Campus Benjamin Franklin, Berlin, Germany

<sup>4</sup>University of North Carolina School of Medicine, Chapel Hill, NC

<sup>5</sup>University of California San Diego, San Diego, CA

<sup>6</sup>Karolinska Institutet and Vicore Pharma, Stockholm, Sweden

<sup>7</sup>The George Institute for Global Health, University of Sydney, Sydney, Australia

<sup>8</sup>South Australian Health and Medical Research Institute, The University of Adelaide, Adelaide, Australia

<sup>9</sup>Department of Medicine Solna, Karolinska Institutet, Stockholm, Sweden

<sup>10</sup>F. Hoffmann-La Roche Ltd., Basel, Switzerland

<sup>11</sup>Sahlgrenska Academy, University of Gothenburg, Gothenburg, Sweden

<sup>12</sup>Department of Cardiovascular Medicine, Cleveland Clinic Coordinating Center for Clinical Research (CSCR), Cleveland, OH

<sup>13</sup>Montreal Heart Institute, Université de Montréal, Montreal, Canada

<sup>14</sup>Division of Cardiology, VA Medical Center and University of Colorado School of Medicine, Denver, CO

Corresponding author: Ilse C. Schrieks, [ilse.schrieks@juliusclinical.com](mailto:ilse.schrieks@juliusclinical.com).

Received 22 January 2018 and accepted 25 April 2018.

Clinical trial reg. no. NCT01042769, [clinicaltrials.gov](http://clinicaltrials.gov).

This article contains Supplementary Data online at <http://care.diabetesjournals.org/lookup/suppl/doi:10.2337/dc18-0158/-/DC1>.

© 2018 by the American Diabetes Association. Readers may use this article as long as the work is properly cited, the use is educational and not for profit, and the work is not altered. More information is available at <http://www.diabetesjournals.org/content/license>.

ischemia-reperfusion injury (2). Observational analyses show a strong and consistent association of higher adiponectin levels with lower risk of incident coronary heart disease (CHD) (3,4), but Mendelian randomization analysis does not support such an association (5). Studies in patients with established CHD have also yielded conflicting evidence, with some indicating favorable and others adverse associations of adiponectin with risk of future cardiovascular events (6–9). FFAs are an important energy substrate; although at elevated concentrations, FFAs may exert proinflammatory, proapoptotic, or proarrhythmic effects and impair endothelial function (10–12).

Adipocyte dysfunction is a hallmark of insulin-resistant states and is manifested by reduced adiponectin and elevated FFA levels. In fact, it has been postulated that low adiponectin and high FFAs may contribute to increased cardiovascular risk in type 2 diabetes (3,13). Agonists of the peroxisome proliferator-activated receptor  $\gamma$  (PPAR- $\gamma$ ) are among the most effective agents to raise adiponectin and lower FFA concentrations in circulation (14). The AleCardio (Effect of Alogliptazar on Cardiovascular Outcomes After Acute Coronary Syndrome in Patients With Type 2 Diabetes Mellitus) trial compared the effects of the dual PPAR- $\alpha/\gamma$  agonist alogliptazar with placebo on cardiovascular morbidity and mortality among patients with type 2 diabetes and acute coronary syndrome (ACS) (NCT01042769, [www.clinicaltrials.gov](http://www.clinicaltrials.gov)). The AleCardio trial showed no effect of alogliptazar on cardiovascular outcomes. Using data from that trial, we evaluated the association of adiponectin and FFAs at baseline and on assigned study treatment with major adverse cardiovascular events (MACEs) and death.

## RESEARCH DESIGN AND METHODS

### Study Design and Patients

This study is a prespecified post hoc analysis of the AleCardio trial data. Study data and study materials are not publicly available for other researchers, but analytic methods can be requested from the corresponding author. The rationale, design, and primary results of the AleCardio trial have been published previously (15,16). The protocol was approved by institutional review boards,

and written informed consent was obtained from all participants. At 720 participating centers in 26 countries, 7,226 patients with established or newly diagnosed type 2 diabetes and recent ACS were randomly assigned to treatment with alogliptazar 150  $\mu$ g daily or placebo, added to standard of care. Randomization occurred during the interval spanning hospital discharge to 12 weeks after the index ACS event. The primary outcome measure was time to first occurrence of cardiovascular death, nonfatal myocardial infarction (MI), or nonfatal stroke (defined as MACEs for this analysis). All-cause and cardiovascular deaths were secondary efficacy measures. After a median follow-up of 2 years, the trial was ended prematurely due to futility for efficacy and in response to a higher incidence of safety end points in the alogliptazar group.

### Laboratory Assessments

All laboratory analyses were conducted by a central laboratory. Blood samples were collected after an overnight fast of at least 8 h at randomization and after 3 months of assigned study treatment. Plasma adiponectin was measured by a quantitative sandwich ELISA (Quantikine Adiponectin/Acrp30 Immunoassay; R&D Systems, Minneapolis, MN) with an intra-assay coefficient of variation of 2.5–4.7% and an interassay coefficient of variation of 5.8–6.9%. FFAs were measured by enzymatic colorimetry (NEFA HR2; Wako Chemicals, Richmond, VA) with an intra-assay coefficient of variation of 0.61–0.75% and an interassay coefficient of variation of 0.03–0.37%. Results were reported with a precision of 0.1 mmol/L. Testing was performed on Roche Modular Analyzers.

### Statistical Methods

We compared baseline characteristics among quartiles of adiponectin and four categories of FFA concentrations using ANOVA or Kruskal-Wallis test for continuous variables, depending on the distribution, and  $\chi^2$  for categorical variables. Categories of FFAs were used instead of exact quartiles because the precision of measurement of FFA concentrations was 0.1 mmol/L, resulting in an unequal distribution of participants across quartiles. The distributions of adiponectin and FFA concentrations were checked, and log transformation

was conducted if required for further analysis.

Correlation between two variables was specified by the Pearson or Spearman correlation coefficient, as appropriate. Cox proportional hazards regression models were used to analyze the association between baseline adiponectin or FFA levels and time to event for MACE, all-cause death, and cardiovascular death. Additionally, we modeled the association between change in adiponectin or change in FFAs from baseline to month 3 of assigned study treatment with each of the three end points (occurring after month 3). We adjusted all models for covariates and treatment, and we stratified for the type of index ACS event (unstable angina, non-ST segment elevation MI, or ST segment elevation MI) and the need for reperfusion therapy for the index ACS event. We checked for a potential interaction with treatment and sex and stratified if necessary. The proportional hazards assumption and functional form of the covariates were evaluated using the ASSESS statement in SAS. Visual inspection of the cumulative Martingale residuals and the formal hypothesis based on simulation were assessed.

We included the following covariates in our model: age; sex; race; geographical region; prior history of MI, stroke or transient ischemic attack, heart failure, and hypertension; duration of diabetes; smoking history; BMI; time from ACS to randomization; systolic and diastolic blood pressure; use of antihyperglycemic agents (insulin, sulfonylureas, and biguanides); HbA<sub>1c</sub>; fasting plasma glucose; LDL cholesterol; HDL cholesterol; triglycerides; hs-CRP; and estimated glomerular filtration rate (eGFR). Adiponectin or FFA concentration was added as a covariate, depending upon which of those was the variable of interest in the analysis. All covariates were selected a priori based on their relation with adiponectin, FFAs, or cardiovascular outcomes, as described in prior literature.

In the analysis on change in adiponectin or FFAs from baseline to month 3, additional adjustment was performed for concurrent changes in systolic and diastolic blood pressure, glucose, insulin, HbA<sub>1c</sub>, LDL cholesterol, HDL cholesterol, triglycerides, eGFR, adiponectin (for analysis on change in FFAs), and FFAs (for analysis on change in adiponectin).

Two sensitivity analyses were performed. In the first, patients treated with exogenous insulin were excluded. In the second, N-terminal pro-B-type natriuretic peptide (NT-proBNP) was added as a covariate to the multivariable model because prior studies showed that NT-proBNP may be related to adiponectin concentrations (17,18).

Missing covariate data were replaced with use of multiple imputation (Markov chain Monte Carlo method). Results were considered significantly different at a  $P$  value of  $<0.05$ . Statistical analyses were performed using SAS statistical software version 9.2 (SAS Institute, Cary, NC).

## RESULTS

### Baseline Characteristics

Baseline adiponectin and FFAs were available for 6,998 and 7,038 patients, respectively. The distribution of baseline levels is tabulated in Supplementary Table 1 and illustrated in Supplementary Fig. 1. Adiponectin and FFA values both have a skewed distribution. The median (interquartile range [IQR]) of adiponectin was 4.0  $\mu\text{g/mL}$  (2.7–6.1). The four categories of FFAs were 0.1–0.3 mmol/L ( $n = 1,878$ ), 0.4–0.5 mmol/L ( $n = 2,308$ ), 0.6–0.7 mmol/L ( $n = 1,683$ ), and 0.8–3.3 mmol/L ( $n = 1,169$ ). As expected, baseline adiponectin and FFA concentrations did not differ between the aleglitazar and placebo groups. Paired baseline and month 3 measurements of adiponectin and FFAs were available for 6,325 and 6,365 patients, respectively. Tables 1 and 2 show baseline characteristics stratified according to adiponectin quartiles and FFA categories. Patients with higher adiponectin levels were older, more frequently women, and had a longer duration of type 2 diabetes. They had lower insulin, triglyceride, and eGFR but higher NT-proBNP, HDL cholesterol, and LDL cholesterol levels. Further, they were more likely to be treated with exogenous insulin but less likely to be treated with biguanides and diuretics.

Differences in baseline characteristics stratified according to FFA categories were less pronounced than those observed across quartiles of adiponectin. Nonetheless, patients with higher FFA levels were older, more frequently women, less frequently past/current smokers, and had a longer duration of type 2

diabetes. They had lower insulin, higher adiponectin, and higher NT-proBNP levels compared with patients with lower FFA levels.

In the aleglitazar arm, median (IQR) adiponectin concentration increased from baseline (4.0  $\mu\text{g/mL}$  [2.7–6.1]) to month 3 (11.9  $\mu\text{g/mL}$  [7.1–19.4]), an increase of 7.5  $\mu\text{g/mL}$  (3.7–13.7) ( $P < 0.001$ ). In the placebo group, adiponectin at month 3 was 4.1  $\mu\text{g/mL}$  (2.6–6.0), a change of 0.0  $\mu\text{g/mL}$  (–0.9 to 0.9) from baseline (Supplementary Table 1 and Supplementary Figs. 2 and 3). FFAs decreased from  $0.5 \pm 0.3$  mmol/L at baseline to  $0.4 \pm 0.2$  mmol/L at month 3 in the aleglitazar arm (a decrease of  $-0.1 \pm 0.3$  mmol/L,  $P < 0.001$ ). In the placebo group, FFAs at month 3 was  $0.5 \pm 0.3$  mmol/L, a change of  $0.0 \pm 0.3$  mmol/L from baseline.

### Association Between Baseline Adiponectin and FFA Levels and Outcomes

A total of 684 (10%) and 688 (10%) MACEs, 276 (4%) and 281 (4%) all-cause deaths, and 202 (3%) and 206 (3%) cardiovascular deaths occurred in patients with baseline adiponectin and FFA data available, respectively. Median (IQR) follow-up time was 1.98 years (1.55–2.46). Figure 1 shows the Kaplan-Meier estimates of survival free of MACEs, all-cause death, and cardiovascular death according to adiponectin quartiles and FFA categories. The risk for each end point increased across quartiles of adiponectin ( $P < 0.001$ ) and categories of FFAs ( $P < 0.05$ ).

Table 3 shows the crude and adjusted risk for MACEs, all-cause death, and cardiovascular death according to baseline adiponectin and FFA concentrations. Baseline adiponectin that was two times higher was associated with higher risk for MACEs (hazard ratio [HR] 1.28 [95% CI 1.18–1.38], adjusted HR 1.17 [1.08–1.27];  $P < 0.001$ ), all-cause death (HR 1.75 [1.56–1.98], adjusted HR 1.53 [1.35–1.73];  $P < 0.001$ ), and cardiovascular death (HR 1.67 [1.45–1.92], adjusted HR 1.51 [1.30–1.76];  $P < 0.001$ ). No interaction existed between randomized treatment assignment and baseline adiponectin concentrations and the risk for any end point event (Table 3). Furthermore, no interaction was found for sex.

A baseline FFA level that was two times higher was associated with a higher risk

for MACEs (HR 1.15 [1.04–1.27], adjusted HR 1.12 [1.02–1.24];  $P = 0.019$ ), all-cause death (HR 1.31 [1.11–1.54], adjusted HR 1.20 [1.03–1.40];  $P = 0.018$ ), and cardiovascular death (HR 1.28 [1.06–1.54], adjusted HR 1.19 [0.99–1.42];  $P = 0.062$ ). As with adiponectin, the interaction between treatment and baseline FFA concentrations and end point events was not significant.

In the first sensitivity analysis, patients treated with exogenous insulin were excluded. The associations of baseline adiponectin with clinical outcomes remained significant with minimal effect on the point estimates of HRs (data not shown); however, the association of baseline FFAs with adverse outcomes was no longer significant. Adiponectin and NT-proBNP were weakly correlated with  $r^2 = 0.09$  ( $P < 0.001$ ). In the second sensitivity analysis with NT-proBNP added as a covariate to the regression model, a baseline adiponectin level that was two times higher remained significantly associated with MACEs (adjusted HR 1.14 [1.04–1.26],  $P = 0.008$ ), all-cause death (adjusted HR 1.19 [1.02–1.39],  $P = 0.025$ ), and cardiovascular death (adjusted HR 1.21 [1.01–1.44],  $P = 0.040$ ), although the associations were attenuated (Table 3). With the addition of NT-proBNP as a covariate, the associations of baseline FFAs with death and cardiovascular death remained significant, but the association with MACEs was attenuated. A similar effect was seen for the separate end-point nonfatal MI (Supplementary Table 2).

### Association Between Change in Adiponectin or FFAs and Outcomes

The associations between changes in adiponectin or FFAs from baseline to month 3 and outcomes are shown in Table 3. A doubling in adiponectin from baseline to month 3 was associated with a higher risk for all-cause death (HR 1.20 [1.03–1.41],  $P = 0.022$ ) and cardiovascular death (HR 1.22 [1.02–1.46],  $P = 0.029$ ) but not MACEs (HR 1.03 [0.93–1.15],  $P = 0.540$ ) after multivariable adjustment. Because a change in adiponectin over time was identified only in the aleglitazar group (Supplementary Table 1,  $P < 0.001$ ), we investigated interaction effects by treatment and conducted stratified analysis by treatment. No significant interaction effects were observed. In addition, interaction

Table 1—Baseline characteristics of AleCardio participants by adiponectin quartiles and FFA categories

| Variable                                   | All<br>n = 7,060 | Adiponectin<br>quartile 1<br>n = 1,749 | Adiponectin<br>quartile 2<br>n = 1,750 | Adiponectin<br>quartile 3<br>n = 1,750 | Adiponectin<br>quartile 4<br>n = 1,749 | P<br>value* | FFA<br>category 1<br>n = 1,878 | FFA<br>category 2<br>n = 2,308 | FFA<br>category 3<br>n = 1,683 | FFA<br>category 4<br>n = 1,169 | P<br>value* |
|--------------------------------------------|------------------|----------------------------------------|----------------------------------------|----------------------------------------|----------------------------------------|-------------|--------------------------------|--------------------------------|--------------------------------|--------------------------------|-------------|
|                                            |                  |                                        |                                        |                                        |                                        |             |                                |                                |                                |                                |             |
| Demographics                               |                  |                                        |                                        |                                        |                                        |             |                                |                                |                                |                                |             |
| Age, years<br>(mean ± SD)                  | 60.8 ± 9.9       | 57.2 ± 9.4                             | 59.6 ± 9.7                             | 61.9 ± 9.5                             | 64.5 ± 9.6                             | <0.001      | 59.8 ± 9.7                     | 60.3 ± 9.8                     | 61.2 ± 10.1                    | 62.7 ± 9.9                     | <0.001      |
| Female sex [n (%)]                         | 1,909 (27)       | 239 (14)                               | 372 (21)                               | 532 (30)                               | 754 (43)                               | <0.001      | 364 (19)                       | 510 (22)                       | 526 (31)                       | 499 (43)                       | <0.001      |
| Race [n (%)]                               |                  |                                        |                                        |                                        |                                        | <0.001      |                                |                                |                                |                                | <0.001      |
| White                                      | 4,707 (67)       | 1,047 (60)                             | 1,188 (68)                             | 1,207 (69)                             | 1,222 (70)                             |             | 1,312 (70)                     | 1,511 (66)                     | 1,117 (66)                     | 749 (64)                       |             |
| Asian                                      | 1,846 (26)       | 567 (32)                               | 436 (25)                               | 432 (25)                               | 398 (23)                               |             | 413 (22)                       | 613 (27)                       | 463 (28)                       | 357 (31)                       |             |
| Black                                      | 215 (3)          | 59 (3)                                 | 47 (3)                                 | 48 (3)                                 | 57 (3)                                 |             | 84 (4)                         | 70 (3)                         | 39 (2)                         | 22 (2)                         |             |
| Other                                      | 290 (4)          | 76 (4)                                 | 78 (4)                                 | 63 (4)                                 | 71 (4)                                 |             | 69 (4)                         | 113 (5)                        | 63 (4)                         | 41 (4)                         |             |
| Region [n (%)]                             |                  |                                        |                                        |                                        |                                        | <0.001      |                                |                                |                                |                                | <0.001      |
| Europe                                     | 2,485 (35)       | 592 (34)                               | 641 (37)                               | 643 (37)                               | 584 (33)                               |             | 676 (36)                       | 773 (34)                       | 570 (34)                       | 454 (39)                       |             |
| Asia/Pacific                               | 1,934 (27)       | 577 (33)                               | 466 (27)                               | 457 (26)                               | 421 (24)                               |             | 450 (24)                       | 620 (27)                       | 494 (29)                       | 368 (31)                       |             |
| North America                              | 1,954 (28)       | 419 (24)                               | 483 (28)                               | 470 (27)                               | 564 (32)                               |             | 569 (30)                       | 655 (28)                       | 462 (27)                       | 263 (23)                       |             |
| South America                              | 679 (10)         | 157 (9)                                | 158 (9)                                | 178 (10)                               | 180 (10)                               |             | 178 (10)                       | 258 (11)                       | 156 (9)                        | 84 (7)                         |             |
| Medical history                            |                  |                                        |                                        |                                        |                                        |             |                                |                                |                                |                                |             |
| Prior MI [n (%)]                           | 1,613 (23)       | 374 (21)                               | 387 (22)                               | 403 (23)                               | 439 (25)                               | 0.053       | 429 (23)                       | 515 (22)                       | 396 (24)                       | 268 (23)                       | 0.844       |
| Prior stroke or TIA                        |                  |                                        |                                        |                                        |                                        |             |                                |                                |                                |                                |             |
| [n (%)]                                    | 551 (8)          | 110 (6)                                | 128 (7)                                | 140 (8)                                | 168 (10)                               | 0.003       | 144 (8)                        | 172 (7)                        | 135 (8)                        | 98 (8)                         | 0.777       |
| History of heart failure [n (%)]           | 746 (11)         | 155 (9)                                | 167 (10)                               | 176 (10)                               | 239 (14)                               | <0.001      | 220 (12)                       | 211 (9)                        | 180 (11)                       | 133 (11)                       | 0.038       |
| History of hypertension [n (%)]            | 5,498 (78)       | 1,286 (74)                             | 1,355 (77)                             | 1,380 (79)                             | 1,431 (82)                             | <0.001      | 1,418 (76)                     | 1,788 (77)                     | 1,314 (78)                     | 959 (82)                       | <0.001      |
| Smoking, current or previous [n (%)]       | 4,332 (61)       | 1,207 (69)                             | 1,118 (64)                             | 1,014 (58)                             | 953 (54)                               | <0.001      | 1,243 (66)                     | 1,508 (65)                     | 988 (59)                       | 578 (50)                       | <0.001      |
| Duration of diabetes, years [median (IQR)] | 5.6 (1.8–11.1)   | 4.5 (1.1–9.8)                          | 5.2 (1.6–10.5)                         | 5.7 (1.8–10.9)                         | 7.6 (2.6–14.6)                         | <0.001      | 5.8 (1.8–11.3)                 | 5.2 (1.7–10.4)                 | 5.5 (1.6–11.3)                 | 6.6 (2.3–12.4)                 | <0.001      |
| BMI, kg/m <sup>2</sup> [median (IQR)]      | 29 (26–32)       | 29 (26–32)                             | 29 (26–33)                             | 29 (26–32)                             | 28 (25–32)                             | <0.001      | 28 (25–32)                     | 28 (26–32)                     | 29 (26–33)                     | 28 (25–33)                     | 0.002       |
| SBP, mmHg (mean ± SD)                      | 128 ± 18         | 126 ± 16                               | 128 ± 17                               | 129 ± 18                               | 130 ± 18                               | <0.001      | 126 ± 18                       | 128 ± 17                       | 129 ± 17                       | 130 ± 18                       | <0.001      |
| DBP, mmHg (mean ± SD)                      | 76 ± 10          | 76 ± 9                                 | 76 ± 9                                 | 76 ± 10                                | 76 ± 10                                | 0.184       | 75 ± 10                        | 76 ± 10                        | 76 ± 10                        | 77 ± 10                        | 0.002       |
| Index ACS event                            |                  |                                        |                                        |                                        |                                        | <0.001      |                                |                                |                                |                                | 0.495       |
| NSTEMI [n (%)]                             | 2,575 (36)       | 627 (36)                               | 624 (36)                               | 628 (36)                               | 676 (39)                               |             | 684 (36)                       | 846 (37)                       | 611 (36)                       | 426 (36)                       |             |
| STEMI [n (%)]                              | 2,775 (39)       | 742 (42)                               | 713 (41)                               | 652 (37)                               | 643 (37)                               |             | 746 (40)                       | 932 (40)                       | 642 (38)                       | 446 (38)                       |             |
| UA [n (%)]                                 | 1,709 (24)       | 379 (22)                               | 413 (24)                               | 470 (27)                               | 430 (25)                               |             | 448 (24)                       | 529 (23)                       | 430 (26)                       | 297 (25)                       |             |

Continued on p. 1796

Table 1—Continued

|                                                  | All<br>n = 7,060 | Adiponectin<br>quartile 1<br>n = 1,749 | Adiponectin<br>quartile 2<br>n = 1,750 | Adiponectin<br>quartile 3<br>n = 1,750 | Adiponectin<br>quartile 4<br>n = 1,749 | P<br>value* | FFA<br>category 1<br>n = 1,878 | FFA<br>category 2<br>n = 2,308 | FFA<br>category 3<br>n = 1,683 | FFA<br>category 4<br>n = 1,169 | P<br>value* |
|--------------------------------------------------|------------------|----------------------------------------|----------------------------------------|----------------------------------------|----------------------------------------|-------------|--------------------------------|--------------------------------|--------------------------------|--------------------------------|-------------|
|                                                  |                  |                                        |                                        |                                        |                                        |             |                                |                                |                                |                                |             |
| Time from ACS to randomization, days (mean ± SD) | 29 ± 15          | 29 ± 15                                | 28 ± 15                                | 29 ± 14                                | 29 ± 15                                | 0.174       | 28 ± 15                        | 29 ± 15                        | 29 ± 15                        | 28 ± 15                        | 0.148       |
| Reperfusion therapy for ACS event [n (%)]        | 5,654 (80)       | 1,465 (84)                             | 1,423 (82)                             | 1,404 (80)                             | 1,313 (75)                             | <0.001      | 1,521 (81)                     | 1,884 (82)                     | 1,306 (78)                     | 926 (79)                       | 0.008       |
| Assignment to aloglitazar [n (%)]                | 3,536 (50)       | 860 (49)                               | 919 (53)                               | 873 (50)                               | 853 (49)                               | 0.114       | 960 (51)                       | 1,162 (50)                     | 853 (51)                       | 553 (47)                       | 0.194       |
| Medication [n (%)]                               |                  |                                        |                                        |                                        |                                        |             |                                |                                |                                |                                |             |
| Aspirin                                          | 6,604 (94)       | 1,637 (94)                             | 1,664 (95)                             | 1,629 (93)                             | 1,615 (92)                             | 0.009       | 1,749 (93)                     | 2,173 (94)                     | 1,558 (93)                     | 1,103 (94)                     | 0.120       |
| Other antiplatelet agents                        | 6,123 (87)       | 1,564 (89)                             | 1,547 (88)                             | 1,505 (86)                             | 1,455 (83)                             | <0.001      | 1,638 (87)                     | 1,993 (86)                     | 1,451 (86)                     | 1,020 (87)                     | 0.720       |
| ACE inhibitors or ARB                            | 5,772 (82)       | 1,437 (82)                             | 1,445 (83)                             | 1,447 (83)                             | 1,395 (80)                             | 0.083       | 1,536 (82)                     | 1,912 (83)                     | 1,360 (81)                     | 945 (81)                       | 0.321       |
| Statins                                          | 6,587 (93)       | 1,648 (94)                             | 1,655 (95)                             | 1,638 (94)                             | 1,590 (91)                             | <0.001      | 1,772 (94)                     | 2,148 (93)                     | 1,570 (93)                     | 1,075 (92)                     | 0.076       |
| β-Blockers                                       | 6,385 (90)       | 1,617 (92)                             | 1,601 (91)                             | 1,584 (91)                             | 1,530 (87)                             | <0.001      | 1,710 (91)                     | 2,114 (92)                     | 1,493 (89)                     | 1,047 (90)                     | 0.011       |
| Diuretics                                        | 2,228 (32)       | 422 (24)                               | 506 (29)                               | 582 (33)                               | 692 (40)                               | <0.001      | 579 (31)                       | 679 (29)                       | 526 (31)                       | 435 (37)                       | <0.001      |
| Insulin                                          | 2,065 (29)       | 481 (28)                               | 483 (28)                               | 521 (30)                               | 563 (32)                               | 0.006       | 663 (35)                       | 578 (25)                       | 462 (27)                       | 353 (30)                       | <0.001      |
| Sulfonylureas                                    | 2,437 (35)       | 597 (34)                               | 612 (35)                               | 599 (34)                               | 609 (35)                               | 0.939       | 605 (32)                       | 791 (34)                       | 596 (35)                       | 435 (37)                       | 0.032       |
| Biguanides                                       | 4,720 (67)       | 1,232 (70)                             | 1,215 (69)                             | 1,164 (67)                             | 1,069 (61)                             | <0.001      | 1,189 (63)                     | 1,548 (67)                     | 1,176 (70)                     | 794 (68)                       | <0.001      |

Values are presented as mean ± SD, median (IQR), or n (%). ARB, angiotensin receptor blocker; DBP, diastolic blood pressure; NSTEMI, non-ST segment elevation MI; SBP, systolic blood pressure; STEMI, ST segment elevation MI; TIA, transient ischemic attack; UA, unstable angina. \*Two-sided P values for overall differences between adiponectin quartiles from ANOVA, Kruskal-Wallis, or  $\chi^2$  tests.

with sex was investigated and no interaction was found, with the exception for the association between change in adiponectin and MACEs ( $P = 0.031$ ). Stratified analysis showed no association between change in adiponectin and MACEs in men (HR 0.99 [0.87–1.12],  $P = 0.82$ ), whereas a borderline significant association for women existed (HR 1.19 [1.00–1.42],  $P = 0.052$ ). The change in FFAs from baseline to month 3 was not associated with outcomes in crude or adjusted models.

When sensitivity analysis was performed by adding NT-proBNP as covariate to the model, associations between change in adiponectin (baseline to month 3) and outcomes were no longer significant (Table 3).

## CONCLUSIONS

This study shows that both FFA and adiponectin levels are directly associated with the risk of MACEs and death in patients with type 2 diabetes and recent ACS. These findings extend the previously reported data on the relation between FFA levels and cardiovascular outcomes; although the observed relationships for adiponectin are opposite to conclusions from prior observational data in patients initially free of cardiovascular events.

In prior cohort studies without prevalent cardiovascular disease, higher adiponectin concentrations were related to a lower risk of incident cardiovascular disease and mortality (3,4). However, the current data are aligned with findings in patients with heart failure (19) or coronary artery disease (20), and in elderly people (21,22), that associated higher concentrations of adiponectin with greater risk of cardiovascular and all-cause death. Furthermore, an analysis of the Examination of Cardiovascular Outcomes with Alogliptin versus Standard of Care in Patients With Type 2 Diabetes Mellitus and Acute Coronary Syndrome (EXAMINE) trial showed a positive association of adiponectin with cardiovascular and all-cause death (23). A post hoc analysis of the Pravastatin or Atorvastatin Evaluation and Infection Therapy (PROVE IT) trial showed an adverse association of adiponectin with 2-year MACE outcomes but not death in 3,933 patients with recent ACS (24). Additionally, in patients without diabetes and a recent acute MI, higher

adiponectin levels have been associated with higher mortality but not cardiovascular mortality (25). The current data extend these findings by demonstrating associations between baseline adiponectin and death, as well as composite MACE outcomes. Furthermore, the current analysis indicates that a rise in adiponectin during the early period after ACS is associated with a greater risk of death, independent of treatment assignment in the clinical trial that provided the source data.

The underlying mechanisms for the adverse associations of adiponectin and FFAs with death and MACEs are unclear. Although most evidence supports the view of adiponectin as an anti-inflammatory mediator (26), a growing body of in vitro data indicates that adiponectin also has the potential to induce proinflammatory effects. Studies in a variety of cell types, including astrocytes (27), renal tubular cells (28), synovial cells (29), macrophages, and T cells (30), demonstrate stimulation of inflammatory signaling pathways by adiponectin. In clinical studies of patients with inflammatory or vascular disease, higher adiponectin levels correlated with greater severity of rheumatoid arthritis (31), higher likelihood of proliferative diabetic retinopathy (32), and greater aortic stiffness in patients with acute MI (33). Alternatively, higher circulating concentrations of adiponectin may reflect “adiponectin resistance” due to a decrease in adiponectin receptor expression or responsiveness in target tissues (34). Under this concept, an adverse association of adiponectin with outcomes might not reflect adverse actions of the adipokine but rather conditions that impair signaling of its favorable effects.

Prior studies have shown a consistent positive association between the circulating concentrations of adiponectin and natriuretic peptides (17,19,35), with evidence that natriuretic peptides stimulate the synthesis and release of adiponectin (18,36). Natriuretic peptides are increased in heart failure and predict poor outcomes. Therefore, we investigated the possibility that the adverse association of adiponectin with outcomes after ACS reflect an underlying adverse association of heart failure and elevated natriuretic peptides. In sensitivity analyses incorporating levels of NT-proBNP as a covariate in Cox regression models,

**Table 2—Baseline laboratory values by adiponectin quartiles and FFA categories**

| Variable                           | All<br>n = 7,060 | Adiponectin<br>quartile 1<br>n = 1,749 | Adiponectin<br>quartile 2<br>n = 1,750 | Adiponectin<br>quartile 3<br>n = 1,750 | Adiponectin<br>quartile 4<br>n = 1,749 | p<br>value* | FFA<br>category 1<br>n = 1,878 | FFA<br>category 2<br>n = 2,308 | FFA<br>category 3<br>n = 1,683 | FFA<br>category 4<br>n = 1,169 | p<br>value* |
|------------------------------------|------------------|----------------------------------------|----------------------------------------|----------------------------------------|----------------------------------------|-------------|--------------------------------|--------------------------------|--------------------------------|--------------------------------|-------------|
| FFAs (mmol/L)                      | 0.5 (0.3–0.7)    | 0.5 (0.3–0.6)                          | 0.5 (0.3–0.6)                          | 0.5 (0.3–0.7)                          | 0.5 (0.4–0.7)                          | <0.001      | 0.1–0.3                        | 0.4–0.5                        | 0.6–0.7                        | 0.8–3.3                        | n/a         |
| Adiponectin (μg/mL)                | 4.0 (2.7–6.1)    | n/a                                    | n/a                                    | n/a                                    | n/a                                    | n/a         | 3.9 (2.6–5.8)                  | 3.7 (2.5–5.7)                  | 4.1 (2.8–6.2)                  | 4.6 (3.0–7.2)                  | <0.001      |
| HbA <sub>1c</sub> (%)              | 7.8 ± 1.6        | 7.9 ± 1.5                              | 7.9 ± 1.7                              | 7.7 ± 1.6                              | 7.7 ± 1.8                              | 0.003       | 7.9 ± 1.7                      | 7.7 ± 1.6                      | 7.8 ± 1.6                      | 7.8 ± 1.6                      | 0.053       |
| HbA <sub>1c</sub> (mmol/mol)       | 62 ± 18          | 63 ± 16                                | 63 ± 19                                | 61 ± 18                                | 61 ± 20                                | 0.003       | 63 ± 19                        | 61 ± 18                        | 62 ± 18                        | 62 ± 18                        | 0.053       |
| FPG (mmol/L)                       | 8.3 ± 3.2        | 8.3 ± 2.9                              | 8.4 ± 3.1                              | 8.3 ± 3.2                              | 8.2 ± 3.6                              | 0.233       | 8.4 ± 3.6                      | 8.1 ± 2.8                      | 8.2 ± 3.0                      | 8.7 ± 3.6                      | <0.001      |
| Insulin (pmol/L)                   | 69 (44–117)      | 80 (50–135)                            | 75 (49–124)                            | 66 (44–112)                            | 56 (34–96)                             | <0.001      | 92 (51–185)                    | 66 (42–107)                    | 66 (42–105)                    | 64 (41–95)                     | <0.001      |
| HDL cholesterol (mg/dL)            | 1.08 ± 0.28      | 0.97 ± 0.21                            | 1.04 ± 0.24                            | 1.10 ± 0.25                            | 1.22 ± 0.34                            | <0.001      | 1.06 ± 0.27                    | 1.06 ± 0.27                    | 1.09 ± 0.27                    | 1.16 ± 0.31                    | <0.001      |
| LDL cholesterol (mg/dL)            | 2.05 ± 0.80      | 1.96 ± 0.74                            | 2.03 ± 0.79                            | 2.06 ± 0.80                            | 2.15 ± 0.86                            | <0.001      | 2.02 ± 0.76                    | 2.05 ± 0.78                    | 2.08 ± 0.84                    | 2.07 ± 0.84                    | 0.300       |
| Triglycerides (mmol/L)             | 1.73 ± 1.08      | 1.93 ± 1.39                            | 1.82 ± 1.17                            | 1.66 ± 0.80                            | 1.52 ± 0.77                            | <0.001      | 1.69 ± 0.91                    | 1.72 ± 0.91                    | 1.75 ± 1.09                    | 1.80 ± 1.53                    | 0.123       |
| hs-CRP (nmol/L)                    | 64 ± 134         | 57 ± 115                               | 64 ± 146                               | 68 ± 136                               | 66 ± 137                               | 0.115       | 59 ± 120                       | 66 ± 141                       | 65 ± 134                       | 65 ± 137                       | 0.045       |
| eGFR (mL/min/1.73 m <sup>2</sup> ) | 78 ± 20          | 82 ± 19                                | 80 ± 19                                | 77 ± 20                                | 73 ± 22                                | <0.001      | 78 ± 20                        | 79 ± 20                        | 78 ± 20                        | 76 ± 21                        | 0.031       |
| NT-proBNP (pg/mL)                  | 832 ± 1,510      | 446 ± 609                              | 595 ± 772                              | 779 ± 995                              | 1,490 ± 2,493                          | <0.001      | 794 ± 1,222                    | 741 ± 1,271                    | 841 ± 1,634                    | 1,054 ± 2,056                  | <0.001      |

Values are presented as mean ± SD or median (IQR). FPG, fasting plasma glucose; n/a, not applicable. \*Two-sided P values for overall differences between adiponectin quartiles from ANOVA or Kruskal-Wallis tests.



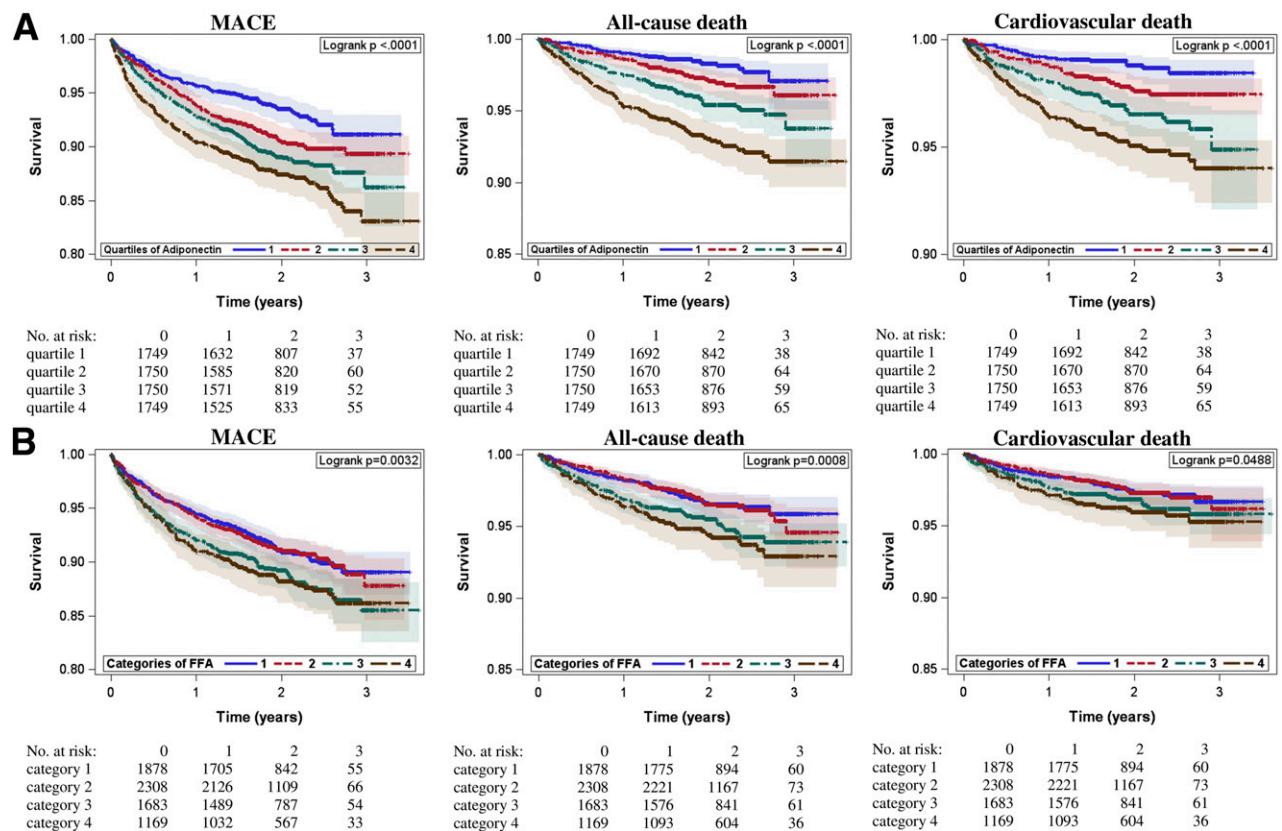

**Figure 1**—Kaplan-Meier curves of survival free of MACEs, all-cause death, and cardiovascular death by baseline adiponectin quartiles (A) and FFA categories (B) with 95% CI bands.

significant adverse associations persisted between baseline adiponectin and death and MACE outcomes, although the HRs were somewhat attenuated. Thus, higher levels of natriuretic peptides may explain part, but not all, of the paradoxical association of adiponectin with adverse outcomes in this study.

Elevated FFA levels in our study population are comparable to levels seen in obese patients and patients with type 2 diabetes (37,38). Elevated FFAs have been postulated to be a risk factor for arrhythmic and atherothrombotic events (9). In prior studies, higher FFA concentrations have been associated with greater risk of incident CHD (39), MACEs in patients with CHD (40), and sudden death (41). The current study extends those findings by demonstrating a strong association of FFAs with MACEs and death in patients with type 2 diabetes and ACS.

#### Study Limitations

The current study is a post hoc observational analysis of a randomized clinical trial. As such, it cannot determine the biological mechanisms responsible for

the adverse association of adiponectin or FFAs with outcomes. Second, unaccounted factors associated with adiponectin or FFAs may introduce an unknown degree of residual confounding. For example, we did not measure and therefore cannot account for relationships with other adipokines (e.g., leptin and ghrelin). Third, because of missing data in baseline or change in adiponectin and FFA concentrations, we had to exclude ~3% and 12% of the patients from our analyses, respectively. Fourth, analyses relating the change in adiponectin or FFAs from baseline to month 3 to outcomes have substantially less power than those relating baseline concentrations to outcomes. This is because there were fewer patients with data from both time points and because the analyses of the changes in biomarkers over time only consider events occurring after month 3. Moreover, the median change in FFAs from baseline was modest, further reducing power in that analysis. Fifth, the relationship of adiponectin and FFA concentrations with the qualifying (index) ACS event for the AleCardio study is unknown. Therefore, we cannot exclude

index event bias as an explanation for the current findings (42). Sixth, adiponectin and FFAs were measured only once at each time point. Intraindividual variability in these measures may have weakened the apparent associations with outcomes. By analogy, intraindividual variability in NT-proBNP may have weakened the effects of adjustment for that variable. Furthermore, a total of 452 patients in AleCardio either withdrew consent or were lost to follow-up prior to the common study end date. We cannot exclude the possibility of resulting bias in our reported results. Finally, the reported adiponectin concentrations represent total adiponectin levels, without discriminating between the low- and more metabolically active high-molecular-weight fractions. However, Kizer et al. (43) found a similar direct positive relation for total and high-molecular-weight adiponectin with cardiovascular and all-cause mortality in older people from the Cardiovascular Health Study.

#### Conclusion

In patients with type 2 diabetes and recent ACS, both baseline adiponectin and FFA

**Table 3—HRs and point estimates of end points per doubling of adiponectin and FFA concentrations at baseline and from baseline to month 3**

|                       |                 | n     | Events (%) | Crude model       | Multivariable model | Interaction of treatment assignment | Multivariable model + NT-proBNP |
|-----------------------|-----------------|-------|------------|-------------------|---------------------|-------------------------------------|---------------------------------|
|                       |                 |       |            | HR (95% CI)       | HR (95% CI)         | Point estimate (95% CI)*            | HR (95% CI)                     |
| Baseline adiponectin  | MACEs           | 6,998 | 684 (10%)  | 1.28 (1.18–1.38)† | 1.17 (1.08–1.27)†   | 1.12 (0.96–1.31)                    | 1.14 (1.04–1.26)†               |
|                       | All-cause death | 6,998 | 276 (4%)   | 1.75 (1.56–1.98)† | 1.53 (1.35–1.73)†   | 1.07 (0.85–1.36)                    | 1.19 (1.02–1.39)‡               |
|                       | CV death        | 6,998 | 202 (3%)   | 1.67 (1.45–1.92)† | 1.51 (1.30–1.76)†   | 1.02 (0.77–1.35)                    | 1.21 (1.01–1.44)‡               |
| Baseline FFAs         | MACEs           | 7,038 | 688 (10%)  | 1.15 (1.04–1.27)† | 1.12 (1.02–1.24)‡   | 0.94 (0.78–1.14)                    | 1.02 (0.93–1.11)                |
|                       | All-cause death | 7,038 | 281 (4%)   | 1.31 (1.11–1.54)† | 1.20 (1.03–1.40)‡   | 1.07 (0.79–1.44)                    | 1.22 (1.07–1.40)†               |
|                       | CV death        | 7,038 | 206 (3%)   | 1.28 (1.06–1.54)‡ | 1.19 (0.99–1.42)    | 1.05 (0.74–1.51)                    | 1.14 (0.97–1.33)                |
| Change in adiponectin | MACEs           | 6,212 | 443 (7%)   | 0.92 (0.84–1.01)  | 1.03 (0.93–1.15)    | 0.95 (0.73–1.25)                    | 1.00 (0.90–1.10)                |
|                       | All-cause death | 6,325 | 188 (3%)   | 1.00 (0.87–1.14)  | 1.20 (1.03–1.41)‡   | 0.84 (0.56–1.28)                    | 1.06 (0.90–1.24)                |
|                       | CV death        | 6,325 | 130 (2%)   | 1.03 (0.87–1.21)  | 1.22 (1.02–1.46)‡   | 0.91 (0.55–1.49)                    | 1.06 (0.89–1.26)                |
| Change in FFAs        | MACEs           | 6,253 | 448 (7%)   | 0.96 (0.87–1.06)  | 0.92 (0.84–1.02)    | 1.12 (0.92–1.36)                    | 0.93 (0.85–1.03)                |
|                       | All-cause death | 6,365 | 191 (3%)   | 0.88 (0.73–1.06)  | 0.93 (0.80–1.08)    | 1.01 (0.75–1.35)                    | 0.93 (0.80–1.08)                |
|                       | CV death        | 6,365 | 131 (2%)   | 0.90 (0.77–1.04)  | 0.90 (0.75–1.08)    | 1.12 (0.79–1.59)                    | 0.89 (0.74–1.07)                |

The multivariable model was adjusted for treatment; baseline  $\log_2$ (FFA) or  $\log_2$ (adiponectin); age; sex; race; region; prior history of MI, stroke or transient ischemic attack, heart failure, and hypertension; duration of diabetes; smoking history; BMI; time from ACS to randomization; systolic and diastolic blood pressure; use of antihyperglycemic agents (insulin, sulfonylureas, biguanides); HbA<sub>1c</sub>; fasting plasma glucose; LDL; HDL; triglycerides; hs-CRP; and eGFR. The model was stratified by ACS index event and reperfusion therapy for ACS. The multivariable model + NT-proBNP was the multivariable model with additional adjustment for log (NT-proBNP). Change models were additionally adjusted for change in  $\log_2$ (FFA) or  $\log_2$ (adiponectin) and change in systolic and diastolic blood pressure, HbA<sub>1c</sub>, fasting plasma glucose, LDL, HDL, triglycerides, hs-CRP, and eGFR from baseline to month 3. The interaction model was the multivariable model with extra adjustment for interaction with treatment. CV, cardiovascular. \*Point estimate shown is the ratio by which the HR of the multivariable model changes when going from aleglitazar to placebo. † $P < 0.01$ . ‡ $P < 0.05$ .

levels are directly associated with the risk of MACEs and death. These relationships persist after multivariable adjustment. Additional adjustment for NT-proBNP attenuates, but does not abrogate, these associations. Moreover, an increase in adiponectin during the 3 months after the ACS event is associated with higher risk for all-cause and cardiovascular death after multivariable adjustment. The neutral results of the AleCardio trial may reflect a balance between beneficial and adverse effects of aleglitazar. Beneficial effects may include reduced FFAs, as well as reduced glycemic indices and triglycerides and increased HDL cholesterol. Adverse effects of aleglitazar may include increased adiponectin, as well as increased LDL cholesterol and creatinine levels, as previously described (16). The present results suggest that interventions that are specifically intended to increase adiponectin are unlikely to be useful in patients with CHD.

**Funding and Duality of Interest.** This work was supported by F. Hoffmann-La Roche (Basel, Switzerland). J.B.B. has received research grants

from AstraZeneca, Boehringer Ingelheim, Bristol-Myers Squibb, Eli Lilly, Gl Dynamics, Intarcia, Johnson & Johnson, Lexicon, Medtronic, Novo Nordisk, Orexigen, Sanofi, Scion NeuroStim, Takeda, and Theracos; has ownership interest in PhaseBio; and has been a consultant for or served on the advisory board for Adocia, AstraZeneca, Dance Biopharm, Eli Lilly, Elcelyx, F. Hoffmann-La Roche, Gl Dynamics, Lexicon, Merck, Metavention, Novo Nordisk, Orexigen, PhaseBio, Quest, Takeda, and vTv Therapeutics. R.R.H. has received research grants from AstaReal, Eli Lilly, Hitachi, F. Hoffmann-La Roche, Lexicon, and Viacety and has been a consultant for or served on the advisory board for Alere, AstraZeneca, Boehringer Ingelheim, Elcelyx, Eli Lilly, Intarcia, Ionis, Johnson & Johnson/Janssen, Sanofi, and REMD. K.M. has been employed by Roche and is currently employed by Vicore Pharma. B.N. has received research grants from Abbvie, Dr. Reddy's Laboratories, Janssen, Roche, and Servier and has received honoraria from Abbott, AstraZeneca, Novartis, Pfizer, Roche, and Servier. S.J.N. has received research grants from Anthera, Amgen, AstraZeneca, Cerenis, Eli Lilly, F. Hoffmann-La Roche, InfraRedX, LipoScience, Novartis, Resverlogix, and Sanofi-Regeneron and has been a consultant for or served on the advisory board for Abbott, Amgen, AstraZeneca, Atheronova, Boehringer Ingelheim, CSL Behring, Esperion, LipoScience, Merck, Novartis, Omthera, Pfizer, Roche, Sanofi, and Takeda. L.R. has received research grants from AFA Insurance Company,

Bayer AG, Karolinska Institutet Funds, Roche, the Swedish Diabetes Association, and the Swedish Heart Lung Foundation and has received honoraria from AstraZeneca, Bristol-Myers Squibb, Roche, and Sanofi. L.M. has received research grants from Bayer AG and has been a consultant for or received honoraria from Merck, Sanofi, Boehringer Ingelheim, and Novo Nordisk. A.S. is employed by F. Hoffmann-La Roche and has ownership interest in F. Hoffmann-La Roche. H.W. has received honoraria from AstraZeneca, Roche, and Pfizer. A.W. is employed by F. Hoffmann-La Roche. A.M.L. has received a research grant from F. Hoffmann-La Roche. J.-C.T. has received research grants from Amarin, Eli Lilly, Ionis, Merck, Pfizer, Roche, Sanofi, Servier, and DalCor and has received honoraria from Servier. D.E.G. has received a research grant from F. Hoffmann-La Roche. G.G.S. has received institutional research support from Cerenis, Resverlogix, F. Hoffmann-La Roche, and Sanofi. No other potential conflicts of interest relevant to this article were reported.

**Author Contributions.** I.C.S. designed the study and wrote the manuscript. A.N. conducted statistical analysis and reviewed and edited the manuscript. B.E.S., J.B.B., R.R.H., K.M., B.N., S.J.N., L.R., L.M., A.S., H.W., A.W., A.M.L., J.-C.T., and D.E.G. reviewed and edited the manuscript. G.G.S. designed the study and wrote and edited the manuscript. I.C.S. is the guarantor of this work and, as such, had full access to all the data in the study and takes responsibility for the



integrity of the data and the accuracy of the data analysis.

**Prior Presentation.** This study was presented at the 2016 Scientific Sessions of the American Heart Association, New Orleans, LA, 12–16 November 2016.

## References

- Weyer C, Funahashi T, Tanaka S, et al. Hypoadiponectinemia in obesity and type 2 diabetes: close association with insulin resistance and hyperinsulinemia. *J Clin Endocrinol Metab* 2001; 86:1930–1935
- Shibata R, Sato K, Pimentel DR, et al. Adiponectin protects against myocardial ischemia-reperfusion injury through AMPK- and COX-2-dependent mechanisms. *Nat Med* 2005;11:1096–1103
- Schulze MB, Shai I, Rimm EB, Li T, Rifai N, Hu FB. Adiponectin and future coronary heart disease events among men with type 2 diabetes. *Diabetes* 2005;54:534–539
- Ai M, Otokoza S, Asztalos BF, et al. Adiponectin: an independent risk factor for coronary heart disease in men in the Framingham Offspring Study. *Atherosclerosis* 2011;217:543–548
- Borges MC, Lawlor DA, de Oliveira C, White J, Horta BL, Barros AJ. Role of adiponectin in coronary heart disease risk: a Mendelian randomization study. *Circ Res* 2016;119:491–499
- Schnabel R, Messow CM, Lubos E, et al. Association of adiponectin with adverse outcome in coronary artery disease patients: results from the AtheroGene study. *Eur Heart J* 2008;29:649–657
- Maiolino G, Cesari M, Sticchi D, et al. Plasma adiponectin for prediction of cardiovascular events and mortality in high-risk patients. *J Clin Endocrinol Metab* 2008;93:3333–3340
- Sattar N, Wannamethee G, Sarwar N, et al. Adiponectin and coronary heart disease: a prospective study and meta-analysis. *Circulation* 2006;114:623–629
- Lindsay RS, Resnick HE, Zhu J, et al. Adiponectin and coronary heart disease: the Strong Heart Study. *Arterioscler Thromb Vasc Biol* 2005; 25:e15–e16
- Pilz S, März W. Free fatty acids as a cardiovascular risk factor. *Clin Chem Lab Med* 2008; 46:429–434
- Frayn KN, Williams CM, Arner P. Are increased plasma non-esterified fatty acid concentrations a risk marker for coronary heart disease and other chronic diseases? *Clin Sci (Lond)* 1996;90:243–253
- Fagot-Campagna A, Balkau B, Simon D, et al. High free fatty acid concentration: an independent risk factor for hypertension in the Paris Prospective Study. *Int J Epidemiol* 1998;27: 808–813
- Djoussé L, Benkeser D, Arnold A, et al. Plasma free fatty acids and risk of heart failure: the Cardiovascular Health Study. *Circ Heart Fail* 2013;6:964–969
- Huang JV, Greyson CR, Schwartz GG. PPAR- $\gamma$  as a therapeutic target in cardiovascular disease: evidence and uncertainty. *J Lipid Res* 2012;53: 1738–1754
- Lincoff AM, Tardif JC, Neal B, et al. Evaluation of the dual peroxisome proliferator-activated receptor  $\alpha/\gamma$  agonist aleglitazar to reduce cardiovascular events in patients with acute coronary syndrome and type 2 diabetes mellitus: rationale and design of the AleCardio trial. *Am Heart J* 2013;166:429–434
- Lincoff AM, Tardif JC, Schwartz GG, et al.; AleCardio Investigators. Effect of aleglitazar on cardiovascular outcomes after acute coronary syndrome in patients with type 2 diabetes mellitus: the AleCardio randomized clinical trial. *JAMA* 2014;311:1515–1525
- Antonopoulos AS, Margaritis M, Coutinho P, et al. Reciprocal effects of systemic inflammation and brain natriuretic peptide on adiponectin biosynthesis in adipose tissue of patients with ischemic heart disease. *Arterioscler Thromb Vasc Biol* 2014;34:2151–2159
- Tsukamoto O, Fujita M, Kato M, et al. Natriuretic peptides enhance the production of adiponectin in human adipocytes and in patients with chronic heart failure. *J Am Coll Cardiol* 2009; 53:2070–2077
- Kistorp C, Faber J, Galatius S, et al. Plasma adiponectin, body mass index, and mortality in patients with chronic heart failure. *Circulation* 2005;112:1756–1762
- Pilz S, Mangge H, Wellnitz B, et al. Adiponectin and mortality in patients undergoing coronary angiography. *J Clin Endocrinol Metab* 2006;91:4277–4286
- Laughlin GA, Barrett-Connor E, May S, Langenberg C. Association of adiponectin with coronary heart disease and mortality: the Rancho Bernardo Study. *Am J Epidemiol* 2007;165:164–174
- Wannamethee SG, Whincup PH, Lennon L, Sattar N. Circulating adiponectin levels and mortality in elderly men with and without cardiovascular disease and heart failure. *Arch Intern Med* 2007;167:1510–1517
- Bergmark BA, Cannon CP, White WB, et al. Baseline adiponectin concentration and clinical outcomes among patients with diabetes and recent acute coronary syndrome in the EXAMINE trial. *Diabetes Obes Metab* 2017;19:962–969
- Wilson SR, Sabatine MS, Wiviott SD, et al.; TIMI Study Group. Assessment of adiponectin and the risk of recurrent cardiovascular events in patients presenting with an acute coronary syndrome: observations from the Pravastatin Or atorVastatin Evaluation and Infection Trial-Thrombolysis in Myocardial Infarction 22 (PROVE IT-TIMI 22). *Am Heart J* 2011;161: 1147–1155.e1
- Ritsinger V, Brismar K, Malmberg K, et al. Elevated levels of adipokines predict outcome after acute myocardial infarction: a long-term follow-up of the Glucose Tolerance in Patients with Acute Myocardial Infarction cohort. *Diab Vasc Dis Res* 2017;14:77–87
- Villarreal-Molina MT, Antuna-Puente B. Adiponectin: anti-inflammatory and cardioprotective effects. *Biochimie* 2012;94:2143–2149
- Wan Z, Mah D, Simtchouk S, Klegeris A, Little JP. Globular adiponectin induces a pro-inflammatory response in human astrocytic cells. *Biochem Biophys Res Commun* 2014;446:37–42
- Perri A, Vizza D, Lupinacci S, et al. Adiponectin secreted by tubular renal cells during LPS exposure worsens the cellular inflammatory damage. *J Nephrol* 2016;29:185–194
- Kontny E, Janicka I, Skalska U, Maśliński W. The effect of multimeric adiponectin isoforms and leptin on the function of rheumatoid fibroblast-like synoviocytes. *Scand J Rheumatol* 2015;44: 363–368
- Cheng X, Folco EJ, Shimizu K, Libby P. Adiponectin induces pro-inflammatory programs in human macrophages and CD4+ T cells. *J Biol Chem* 2012;287:36896–36904
- Liu D, Luo S, Li Z. Multifaceted roles of adiponectin in rheumatoid arthritis. *Int Immunopharmacol* 2015;28:1084–1090
- Hong SB, Lee JJ, Kim SH, et al. The effects of adiponectin and inflammatory cytokines on diabetic vascular complications in obese and non-obese patients with type 2 diabetes mellitus. *Diabetes Res Clin Pract* 2016;111:58–65
- Reinstadler SJ, Klug G, Feistritz HJ, et al. Relation of plasma adiponectin levels and aortic stiffness after acute ST-segment elevation myocardial infarction. *Eur Heart J Acute Cardiovasc Care* 2014;3:10–17
- Ruscica M, Baragetti A, Catapano AL, Norata GD. Translating the biology of adipokines in atherosclerosis and cardiovascular diseases: gaps and open questions. *Nutr Metab Cardiovasc Dis* 2017;27:379–395
- von Eynatten M, Hamann A, Twardella D, Nawroth PP, Brenner H, Rothenbacher D. Relationship of adiponectin with markers of systemic inflammation, atherogenic dyslipidemia, and heart failure in patients with coronary heart disease. *Clin Chem* 2006;52:853–859
- Costello-Boerrigter LC, Burnett JC Jr. A new role for the natriuretic peptides: metabolic regulators of the adipocyte. *J Am Coll Cardiol* 2009; 53:2078–2079
- Golay A, Swislocki AL, Chen YD, Reaven GM. Relationships between plasma-free fatty acid concentration, endogenous glucose production, and fasting hyperglycemia in normal and non-insulin-dependent diabetic individuals. *Metabolism* 1987;36:692–696
- Opie LH, Walfish PG. Plasma free fatty acid concentrations in obesity. *N Engl J Med* 1963; 268:757–760
- Pirro M, Mauriège P, Tchernof A, et al. Plasma free fatty acid levels and the risk of ischemic heart disease in men: prospective results from the Québec Cardiovascular Study. *Atherosclerosis* 2002;160:377–384
- Pilz S, Schrnagl H, Tiran B, et al. Free fatty acids are independently associated with all-cause and cardiovascular mortality in subjects with coronary artery disease. *J Clin Endocrinol Metab* 2006;91:2542–2547
- Jouven X, Charles MA, Desnos M, Ducimetière P. Circulating nonesterified fatty acid level as a predictive risk factor for sudden death in the population. *Circulation* 2001;104:756–761
- Smits LJ, van Kuijk SM, Leffers P, Peeters LL, Prins MH, Sep SJ. Index event bias—a numerical example. *J Clin Epidemiol* 2013;66:192–196
- Kizer JR, Benkeser D, Arnold AM, et al. Associations of total and high-molecular-weight adiponectin with all-cause and cardiovascular mortality in older persons: the Cardiovascular Health Study. *Circulation* 2012;126:2951–2961
